# Supplementary material for: A Novel Role for Plasminogen Activator Inhibitor Type-2 as a Hypochlorite-Resistant Serine Protease Inhibitor and Holdase Chaperone
Source: MDPI journal article supplement (doi:10.3390/cells11071152), 2022-03-29
Supplement: s1 [file s1]

## Supplementary Material

|           | Page |
|-----------|------|
| Figure S1 | 2    |
| Figure S2 | 3    |
| Figure S3 | 4    |
| Figure S4 | 5    |
| Figure S5 | 6    |
| Table S1  | 7    |
| Table S2  | 8    |
| Table S3  | 8    |

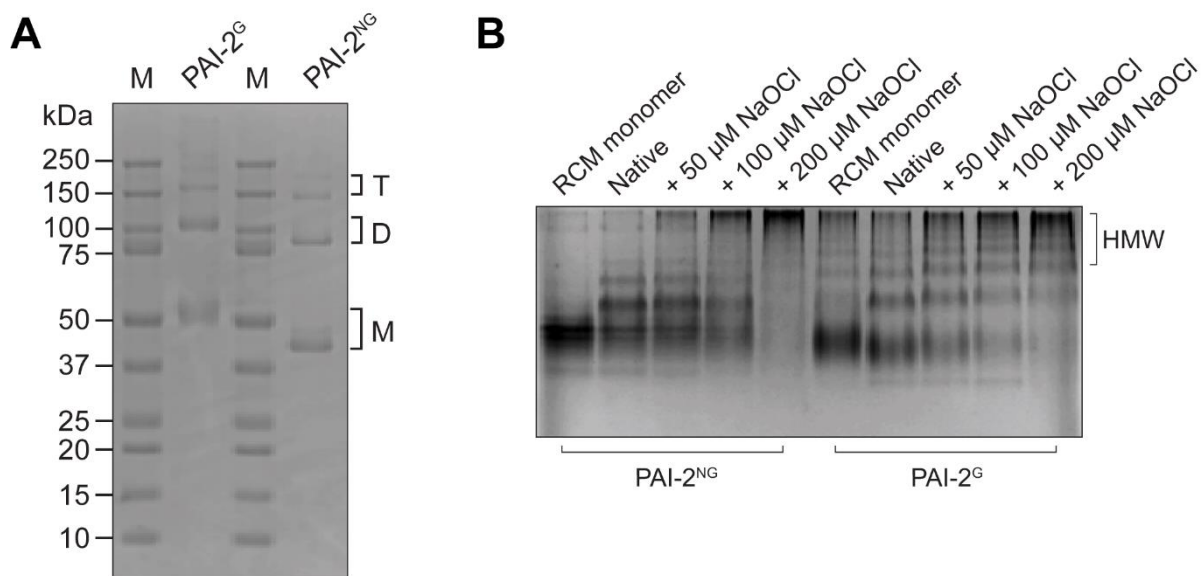

**Figure S1. SDS-PAGE and native PAGE analyses of PAI-2<sup>G</sup> and PAI-2<sup>NG</sup>.** (A) PAI-2<sup>G</sup> and PAI-2<sup>NG</sup> were separated by non-reducing SDS-PAGE using a 4–12% Bis-Tris gel. Protein molecular weight standards (lane M) are included for comparison, with sizes as indicated in kDa. Positions of PAI-2<sup>G</sup> and PAI-2<sup>NG</sup> monomers (M), dimers (D) and trimers (T) are marked. (B) PAI-2<sup>G</sup> or PAI-2<sup>NG</sup> pre-treated with 0–200  $\mu$ M NaOCl were separated by native PAGE using an 8% Tris-glycine gel. A reduced, S-carboxymethylated sample (RCM monomer) is included as a standard to define the migratory position of the monomer for each PAI-2<sup>G</sup> and PAI-2<sup>NG</sup>. High molecular weight oligomers and complexes (HMW) are marked. Note the lower isoelectric point of PAI-2<sup>G</sup> (pI=4.4), versus PAI-2<sup>NG</sup> (pI=5), which affects migration under native PAGE conditions (approximate running pH=8).

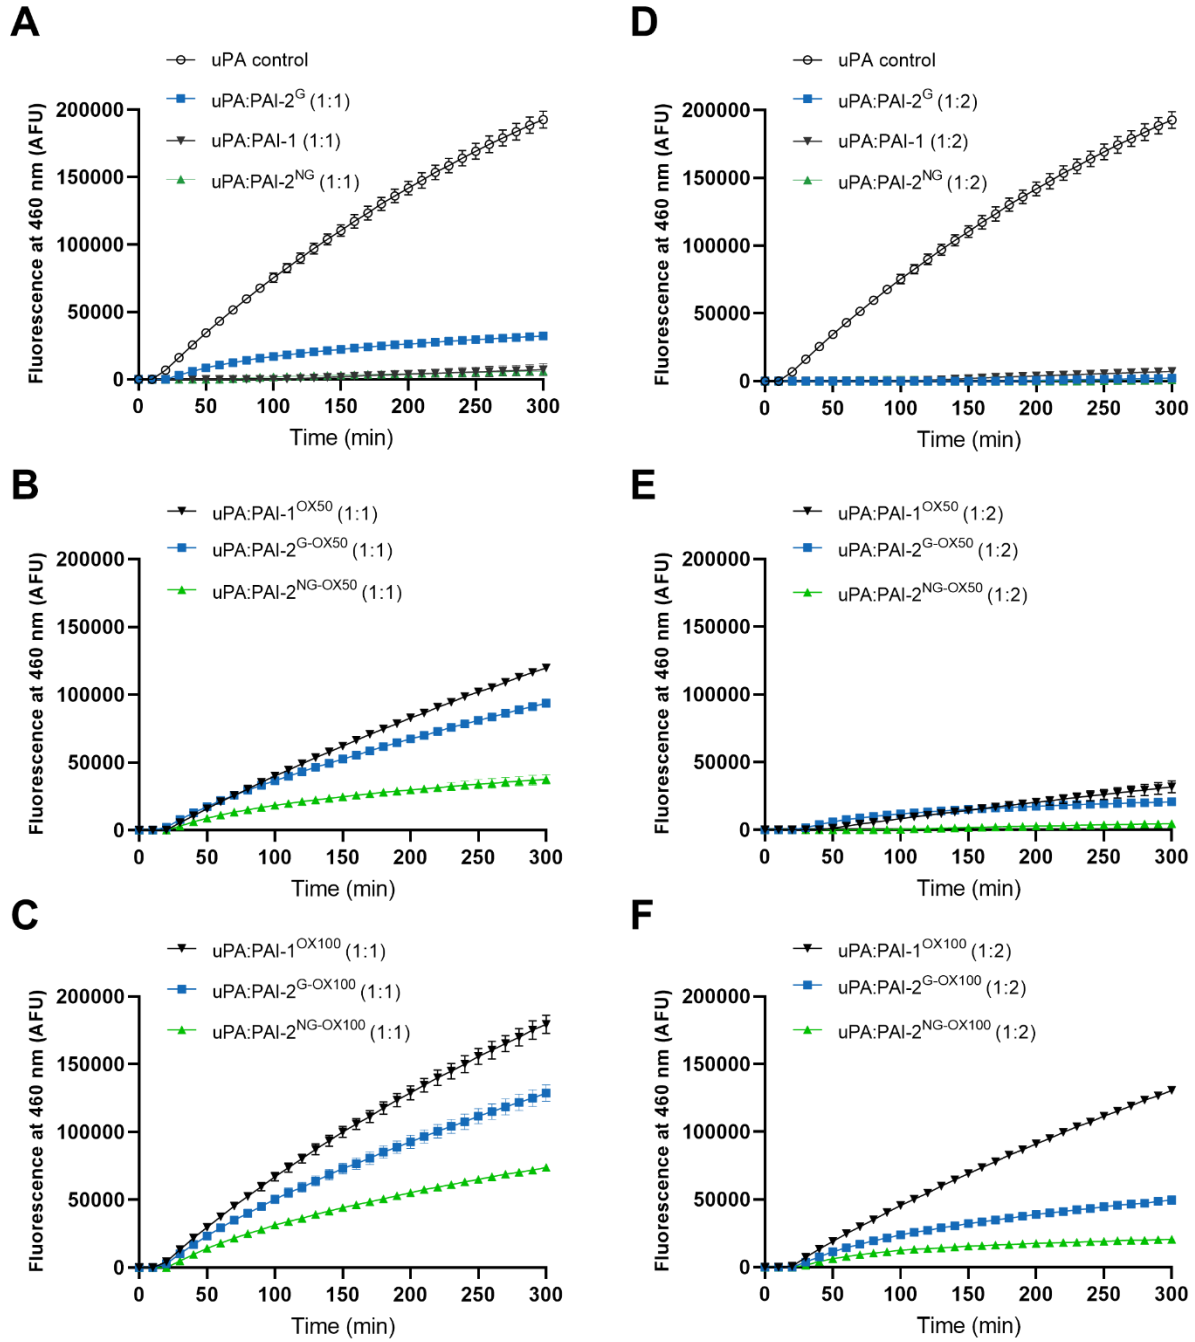

**Figure S2. Effect of hypochlorite treatment on uPA inhibitory activity of PAIs at different molar ratios of PAI to uPA.** Representative kinetic uPA activity plots showing the inhibitory effect of (A) Native PAIs, (B) 50  $\mu$ M NaOCl pre-treated (OX50) PAIs and (C) 100  $\mu$ M NaOCl pre-treated (OX100) PAIs at a 1:1 molar ratio of uPA:PAI; or (D) Native PAIs, (E) OX50 PAIs and (F) 100OX PAIs at a 1:2 molar ratio of uPA:PAI. Data points show the mean fluorescence  $\pm$  SD for triplicate determinations at each time point. The fluorescence of uPA control (no PAIs) was included as a control. The average rate of change in fluorescence is presented in Figure 2 of the main article.

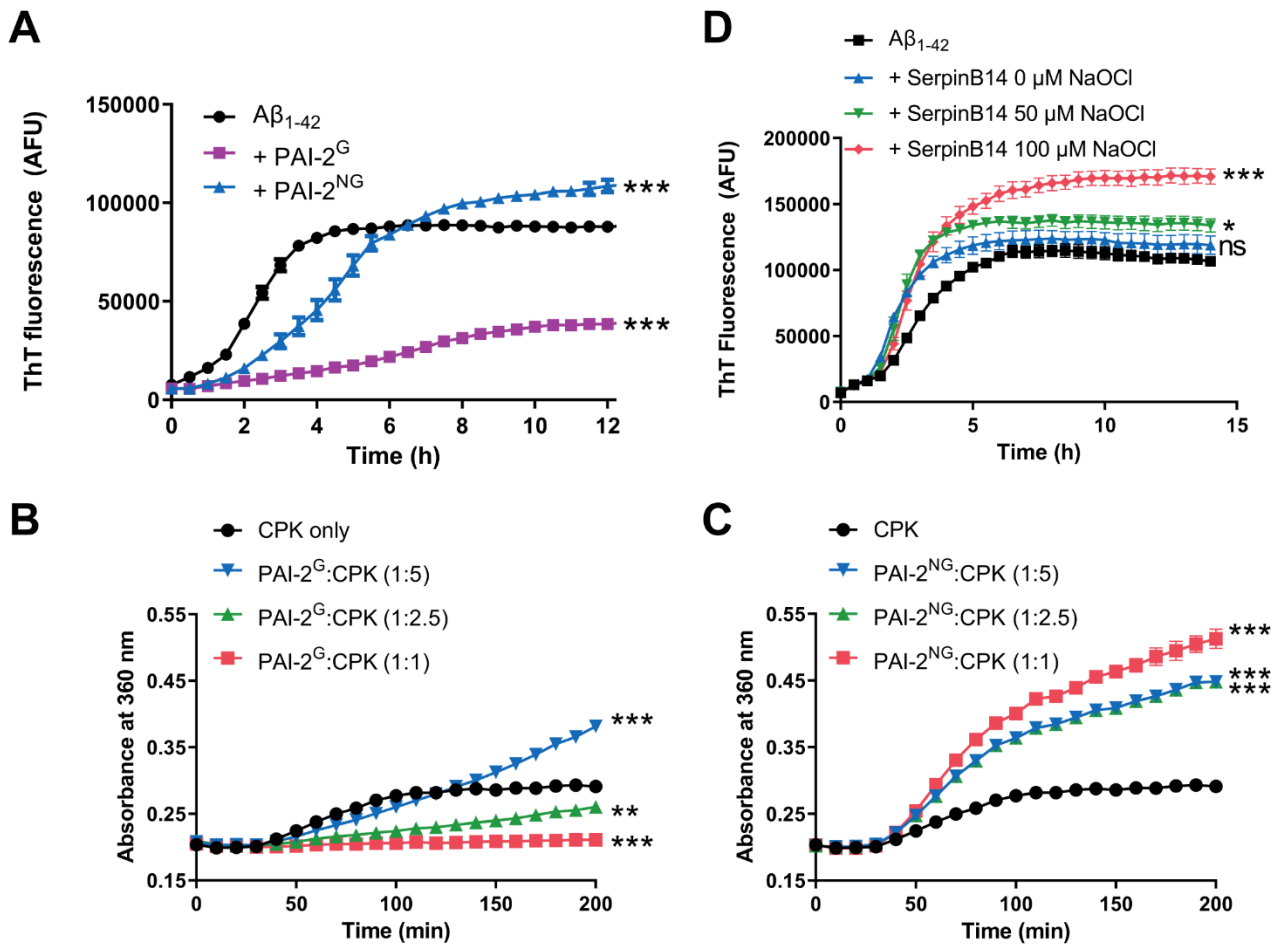

**Figure S3.** Effect of PAI-2<sup>G</sup> and PAI-2<sup>NG</sup> on the aggregation of  $A\beta_{1-42}$  and creatine phosphokinase, and the effect of SerpinB14 on the aggregation of  $A\beta_{1-42}$  following hypochlorite treatment. (A)  $A\beta_{1-42}$  (3  $\mu$ M) was incubated with 25  $\mu$ M ThT in PBS at 28°C  $\pm$  20  $\mu$ g/mL of PAI-2<sup>G</sup> or PAI-2<sup>NG</sup>. (B and C) Creatine phosphokinase (CPK; 6.5  $\mu$ M) was incubated at 43°C with shaking  $\pm$  (B) PAI-2<sup>G</sup> or (C) PAI-2<sup>NG</sup> at molar ratios of 1:1, 1:2.5 or 1:5 (PAI-2:CPK). Turbidity indicative of CPK aggregation was monitored by measuring absorbance at 360 nm of the solution. (D)  $A\beta_{1-42}$  was incubated as before except  $\pm$  SerpinB14 that had been pre-treated with 0–100  $\mu$ M hypochlorite at a 1:10 molar ratio (SerpinB14: $A\beta_{1-42}$ ). All data are means  $\pm$  SEM (n=3) and are representative of three independent experiments. One-way ANOVA with post-hoc Tukey's HSD was conducted on the assay endpoints to identify non-significant (ns) and significant differences (\*\*\* =  $P < 0.001$ ; \*\* =  $P < 0.01$ ; \* =  $P < 0.05$ ). Statistical results are shown based on comparisons with  $A\beta_{1-42}$  or CPK only.

A

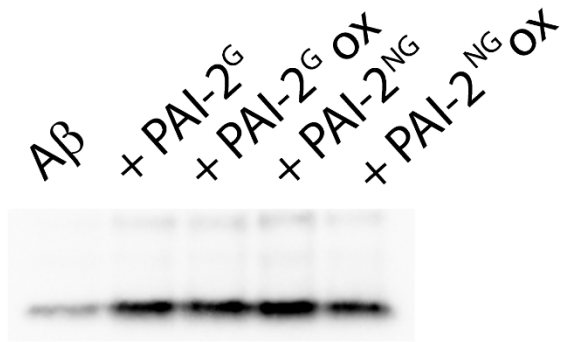

|                          | Soluble Aβ  | P value |
|--------------------------|-------------|---------|
| + PAI-2 <sup>G</sup>     | 3.07 ± 0.72 | < 0.05  |
| + PAI-2 <sup>G</sup> ox  | 3.16 ± 1.21 | < 0.05  |
| + PAI-2 <sup>NG</sup>    | 3.54 ± 1.23 | < 0.01  |
| + PAI-2 <sup>NG</sup> ox | 3.01 ± 0.43 | < 0.05  |

B

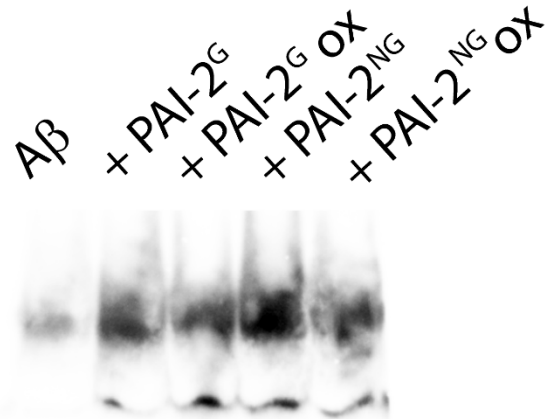

**Figure S4.** Effect of PAI-2 on the solubility of Aβ<sub>1-42</sub> as assessed by (A) native Western Blot analysis and (B) streptavidin-biotin pull down assay. PAI-2<sup>G</sup> and PAI-2<sup>NG</sup> were pre-treated with 200 μM NaOCl in PBS and then extensively dialysed to generate PAI-2<sup>G</sup>ox and PAI-2<sup>NG</sup>ox, respectively (see Methods 2.3). All samples of PAI-2 were then biotinylated following the manufacturer's instructions (Sigma-Aldrich). Aβ<sub>1-42</sub> (5 μM) was incubated with 25 μM ThT in PBS at 30°C ± 1 μM PAI-2<sup>G</sup>, PAI-2<sup>NG</sup>, PAI-2<sup>G</sup>ox or PAI-2<sup>NG</sup>ox overnight. Following centrifugation, the soluble protein fraction was recovered and subjected to native Western blot analysis for Aβ<sub>1-42</sub> detected using a monoclonal anti-Aβ<sub>1-42</sub> antibody (W02). Panel (A) shows a representative Western blot image of Aβ<sub>1-42</sub>. Densitometry analysis was performed and the mean soluble Aβ<sub>1-42</sub> relative to the control sample containing Aβ<sub>1-42</sub> alone is reported (n = 3 ± SD). All forms of PAI-2 increased the solubility of Aβ<sub>1-42</sub>, compared to Aβ<sub>1-42</sub> alone, as determined using one-way ANOVA and post-hoc Tukey's HSD analysis. However, there was no difference between the different PAI-2 forms under the conditions used. Panel (B) shows a Western Blot of Aβ<sub>1-42</sub> pulled down with biotinylated PAI-2 recovered using Dynabeads™ MyOne™ Streptavidin C1 according to the manufacturer's instructions (Invitrogen). Washing was performed using PBS, pH 7.4 containing 0.01% [w/v] BSA to minimise the non-specific binding of Aβ<sub>1-42</sub> to the beads. The recovered protein was separated by reducing SDS-PAGE using a 4–12% Bis-Tris gel prior to Western blot analysis.



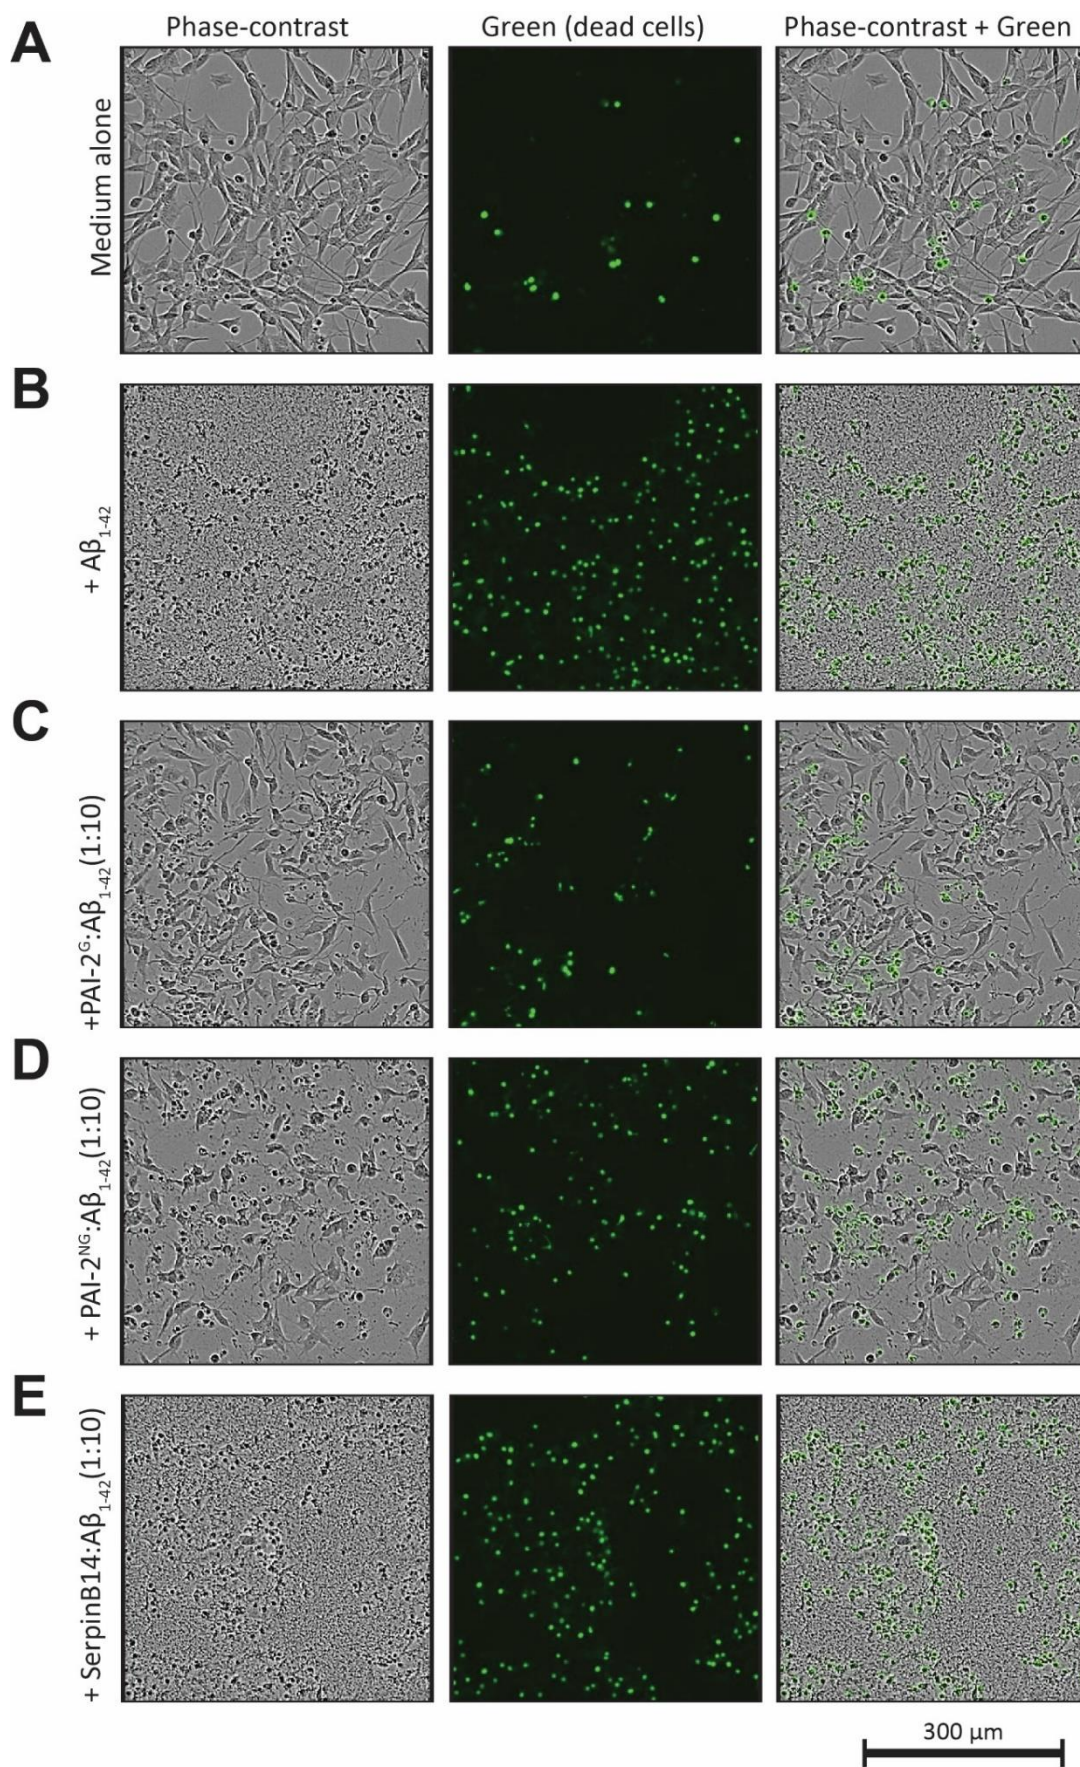

**Figure S5.** Representative photomicrographs showing the effect of PAI-2 on  $A\beta_{1-42}$ -induced cytotoxicity and morphology of SH-SY5Y cells. Images taken at 48 h timepoint from a cytotoxicity experiment as described in Figure 3F for (A) medium alone control, (B)  $A\beta_{1-42}$ , (C) PAI-2<sup>G</sup>: $A\beta_{1-42}$  (1:10 molar ratio), (D) PAI-2<sup>NG</sup>: $A\beta_{1-42}$  (1:10 molar ratio) and (E) SERPINB14: $A\beta_{1-42}$  (1:10 molar ratio).

**Table S1.** Summary of demographic and clinical characteristics of the subjects whose placentas were analysed as part of this study, along with immunohistochemical scores.

| Variable                                        | Severe Preeclampsia<br>n=15 | Idiopathic Preterm Birth<br>n=15 | p value |
|-------------------------------------------------|-----------------------------|----------------------------------|---------|
| Maternal age, years *                           | 25 ± 9                      | 29 ± 8                           | 0.146   |
| Race/ethnicity †                                |                             |                                  |         |
| Non-Hispanic White                              | 7 (47)                      | 8 (53)                           | 0.381   |
| Non-Hispanic Black                              | 6 (40)                      | 6 (40)                           |         |
| Hispanic                                        | 2 (13)                      | 0 (0)                            |         |
| Other                                           | 0 (0)                       | 1 (7)                            |         |
| Nulliparity ‡                                   | 11 (73)                     | 7 (47)                           | 0.264   |
| Systolic blood pressure *                       | 169 ± 20                    | 118 ± 13                         | <0.001  |
| Diastolic blood pressure *                      | 99 ± 10                     | 67 ± 6                           | <0.001  |
| HELLP manifestations ‡                          | 4 (27)                      | 0 (0)                            | 0.100   |
| Fetal growth restriction ‡                      | 6 (40)                      | 0 (0)                            | 0.017   |
| Neurological symptoms including headache ‡      | 7 (47)                      | 0 (0)                            | 0.006   |
| Seizures ‡                                      | 1 (7)                       | 0 (0)                            | 1.000   |
| Gestational age at delivery, weeks *            | 30 ± 2                      | 30 ± 2                           | 0.823   |
| Medically indicated delivery for preeclampsia ‡ | 15 (100)                    | 0 (0)                            | <0.001  |
| PPROM ‡                                         | 6 (40)                      | 0 (0)                            | 0.017   |
| Cesarean delivery ‡                             | 13 (87)                     | 8 (53)                           |         |
| Birthweight, grams *                            | 1,269 ± 458                 | 1,597 ± 408                      | 0.048   |
| Newborn sex ‡                                   |                             |                                  |         |
| Female                                          | 8 (53)                      | 10 (67)                          | 0.710   |
| Male                                            | 7 (47)                      | 5 (33)                           |         |
| 1 min Apgar §                                   | 6 [5 – 7]                   | 7 [5 – 8]                        | 0.344   |
| 5 min Apgar §                                   | 8 [8 – 9]                   | 9 [8 – 9]                        | 0.162   |
| PAI-2 staining score §                          | 1 [0-4]                     | 2 [1-5]                          | 0.246   |
| PAI-2-staining score distribution †             |                             |                                  |         |
| Absent or weak (0-1)                            | 8 (53)                      | 4 (27)                           | 0.189   |
| Intermediate (2-3)                              | 2 (13)                      | 6 (40)                           |         |
| Strong (4-5)                                    | 5 (33)                      | 5 (33)                           |         |

\* Data presented as mean ± standard deviation and compared using Student t-test

† Data presented as n (%) and analysed by Chi-square test

‡ Data presented as n (%) and analysed by Fisher's exact test

§ Data presented as median [interquartile range] and analysed by Mann-Whitney test

Table S2: Summary of ThT fluorescence curves generated by incubating A $\beta$ <sub>1-42</sub> ± PAI-2 as shown in Fig. 3A and B.

|                                                         | Initial lag phase duration (h) | Maximum rate of aggregation ( $\Delta$ ThT AFU/h)<br>n= 3 $\pm$ SD | Maximum THT fluorescence (AFU)<br>n= 3 $\pm$ SD |
|---------------------------------------------------------|--------------------------------|--------------------------------------------------------------------|-------------------------------------------------|
| A $\beta$ <sub>1-42</sub>                               | Negligible                     | 36,037.33 $\pm$ 4,353.51                                           | 63,225.80 $\pm$ 2,005.26                        |
| PAI-2 <sup>G</sup> : A $\beta$ <sub>1-42</sub> (1:10)   | 2                              | <b>7,483.70 <math>\pm</math> 940.81 *</b>                          | 63,225.84 $\pm$ 5,034.73 *                      |
| PAI-2 <sup>G</sup> : A $\beta$ <sub>1-42</sub> (1:7.5)  | 2.4                            | <b>3,982.13 <math>\pm</math> 1,432.33</b>                          | 44,299.17 $\pm$ 16,177.31 **                    |
| PAI-2 <sup>G</sup> : A $\beta$ <sub>1-42</sub> (1:5)    | 5                              | <b>2,819.45 <math>\pm</math> 436.27 **</b>                         | <b>27,566.84 <math>\pm</math> 4,240.52 *</b>    |
| PAI-2 <sup>G</sup> : A $\beta$ <sub>1-42</sub> (1:2.5)  | 5.5                            | <b>124.11 <math>\pm</math> 67.66 **</b>                            | <b>9,188.50 <math>\pm</math> 2,158.28 *</b>     |
| PAI-2 <sup>NG</sup> : A $\beta$ <sub>1-42</sub> (1:10)  | 0.5                            | 23,868.11 $\pm$ 7,139.39                                           | 131,560.20 $\pm$ 27,517.30                      |
| PAI-2 <sup>NG</sup> : A $\beta$ <sub>1-42</sub> (1:7.5) | 1.5                            | <b>17,336.33 <math>\pm</math> 8,006.07</b>                         | 117,279.52 $\pm$ 43,669.01                      |
| PAI-2 <sup>NG</sup> : A $\beta$ <sub>1-42</sub> (1:5)   | 2.5                            | <b>5,074.67 <math>\pm</math> 701.37</b>                            | 45,759.50 $\pm$ 5,459.84                        |
| PAI-2 <sup>NG</sup> : A $\beta$ <sub>1-42</sub> (1:2.5) | 4                              | <b>2,674.57 <math>\pm</math> 509.52</b>                            | <b>20,800.50 <math>\pm</math> 1,919.77</b>      |

Bold font denotes reduced compared to A $\beta$ <sub>1-42</sub> alone; Tukey HSD p < 0.05. \* or \*\* Denotes reduced compared to the corresponding sample containing PAI-2<sup>NG</sup> at the same molar ratio p < 0.05 and p < 0.01, respectively; Student's t-test

Table S3: Summary of ThT fluorescence curves generated by incubating A $\beta$ <sub>1-42</sub> ± PAI-2 pre-treated with 0-200  $\mu$ M NaOCl as shown in Fig. 3C and D.

|                                         | Initial lag phase duration (h) | Maximum rate of aggregation ( $\Delta$ ThT AFU/h)<br>n= 3 $\pm$ SD | Maximum THT fluorescence (AFU)<br>n= 3 $\pm$ SD |
|-----------------------------------------|--------------------------------|--------------------------------------------------------------------|-------------------------------------------------|
| A $\beta$ <sub>1-42</sub>               | Negligible                     | 20,207.33 $\pm$ 993.57                                             | 87,102.66 $\pm$ 1,245.23                        |
| + PAI-2 <sup>G</sup> 0 $\mu$ M NaOCl    | 2                              | <b>4,879.87 <math>\pm</math> 1,307.28</b>                          | <b>39,113.67 <math>\pm</math> 1,079.35</b>      |
| + PAI-2 <sup>G</sup> 50 $\mu$ M NaOCl   | 2                              | <b>2,961.39 <math>\pm</math> 616.85</b>                            | <b>30,615.11 <math>\pm</math> 5,361.45</b>      |
| + PAI-2 <sup>G</sup> 100 $\mu$ M NaOCl  | 2                              | <b>2,763.52 <math>\pm</math> 769.47</b>                            | <b>33,275.34 <math>\pm</math> 2,473.78</b>      |
| + PAI-2 <sup>G</sup> 200 $\mu$ M NaOCl  | 2                              | <b>4,079.08 <math>\pm</math> 220.41</b>                            | <b>40,555.00 <math>\pm</math> 2,351.17</b>      |
| + PAI-2 <sup>NG</sup> 0 $\mu$ M NaOCl   | 1.5                            | <b>16,107.78 <math>\pm</math> 377.20</b>                           | 109,826.37 $\pm$ 6,464.30                       |
| + PAI-2 <sup>NG</sup> 50 $\mu$ M NaOCl  | 2                              | <b>4,347.00 <math>\pm</math> 966.94 *</b>                          | <b>34,817.33 <math>\pm</math> 6,261.53 *</b>    |
| + PAI-2 <sup>NG</sup> 100 $\mu$ M NaOCl | 2                              | <b>4,888.67 <math>\pm</math> 279.21 *</b>                          | <b>41,483.67 <math>\pm</math> 1,749.58 *</b>    |
| + PAI-2 <sup>NG</sup> 200 $\mu$ M NaOCl | 2                              | <b>3,457.89 <math>\pm</math> 329.73 *</b>                          | <b>31,049.67 <math>\pm</math> 3,549.68 *</b>    |

Bold font denotes reduced compared to A $\beta$ <sub>1-42</sub> alone; Tukey HSD p < 0.05. \* Denotes reduced compared to the corresponding sample containing PAI-2<sup>NG</sup> 0  $\mu$ M NaOCl; p < 0.01, Student's t-test
